# Supplementary material for: A first investigation of hydrogeology and hydrogeophysics of the Maqu catchment in the Yellow River source region
Source: Copernicus journal article supplement (doi:10.5194/essd-13-4727-2021), 2021-10-15
Supplement: Supplementary file 1 [file essd-13-4727-2021-supplement.zip]

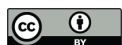

## *Supplement of*

# **A first investigation of hydrogeology and hydrogeophysics of the Maqu catchment in the Yellow River source region**

**Mengna Li et al.**

*Correspondence to:* Zhongbo Su (z.su@utwente.nl), Yijian Zeng (y.zeng@utwente.nl), and Hui Qian (qianhui@chd.edu.cn)

- [essd-13-4727-2021-supplement-title-page.pdf](#)
- [1.https-doi.org-10.17026-dans-z6t-zpn7'.zip](#)
- [2.https-doi.org-10.11888-Hydro.tpd.271221.zip](#)

The copyright of individual parts of the supplement might differ from the article licence.
